# Supplementary material for: Gamma-glutamyltransferase and risk of cardiovascular mortality: A dose-response meta-analysis of prospective cohort studies
Source: PubMed Central journal article supplement (PMC5322906; doi:10.1371/journal.pone.0172631), 2017-02-23
Supplement: pone.0172631.s003.pdf [file pone.0172631.s003.pdf]

S1 Table: Study-specific and summary HRs for CV mortality, per 10 U/L increase in GGT level.

| First author, year        | Gender (men %) | HR (95% CI)     | P     |
|---------------------------|----------------|-----------------|-------|
| Ruttman E,2005 [17]       | Male           | 1.06(1.04-1.09) | 0.000 |
| Ruttman E,2005 [17]       | Female         | 1.10(1.06-1.14) | 0.000 |
| Wannamethee S G,2008 [18] | Male           | 1.11(1.05-1.17) | 0.000 |
| Breitling L P,2011 [19]   | Male           | 1.13(1.07-1.12) | 0.000 |
| Kengne A P,2012 [20]      | Male           | 1.09(1.05-1.13) | 0.000 |
| Kengne A P,2012 [20]      | Female         | 1.13(1.10-1.18) | 0.000 |
| Sung K C,2015 [22]        | Both(60%)      | 1.07(0.95-1.20) | 0.266 |
| Li Y,2016 [23]            | Male           | 1.13(1.10-1.18) | 0.000 |
| Li Y,2016 [23]            | Female         | 1.19(1.04-1.35) | 0.009 |
| Hozawa A,2006 [27]        | Male           | 0.97(0.87-1.08) | 0.543 |
| Hozawa A,2006 [27]        | Female         | 1.17(1.03-1.33) | 0.015 |
| Total                     | Total          | 1.10(1.08-1.11) | 0.000 |

Notes:In the study-specific dose-response analysis, HRs were significant in 9 studies ( $P < 0.05$ ) and not significant in 2 studies ( $P > 0.05$ ). The total HR was significant with substantial heterogeneity ( $I^2 = 49.3\%$  ,  $P= 0.032$ ).
