# Supplementary material for: Gamma-glutamyltransferase and risk of cardiovascular mortality: A dose-response meta-analysis of prospective cohort studies
Source: PubMed Central journal article supplement (PMC5322906; doi:10.1371/journal.pone.0172631), 2017-02-23
Supplement: pone.0172631.s004.pdf [file pone.0172631.s004.pdf]

S2 Table. Dose-response meta-analysis on hazard ratios (HRs) for CV mortality per 10U/L increase in GGT, each study removed in turn.

| Study removed             |                | Pooled HR (95% CI) of remaining studies | P value | Test for heterogeneity |         |
|---------------------------|----------------|-----------------------------------------|---------|------------------------|---------|
| First author, year        | Gender (men %) |                                         |         | I <sup>2</sup> (%)     | P value |
| Ruttman E-M,2005 [17]     | Male           | 1.11 (1.10, 1.13)                       | 0       | 29.90%                 | 0.17    |
| Ruttman E-F,2005 [17]     | Female         | 1.10 (1.08, 1.11)                       | 0       | 63.00%                 | 0.004   |
| Wannamethee S G,2008 [18] | Male           | 1.09 (1.08, 1.11)                       | 0       | 62.80%                 | 0.004   |
| Breitling L P,2011 [19]   | Male           | 1.09 (1.08, 1.11)                       | 0       | 60.50%                 | 0.007   |
| Kengne A P-M,2012 [20]    | Male           | 1.10 (1.08, 1.11)                       | 0       | 62.90%                 | 0.004   |
| Kengne A P-F,2012 [20]    | Female         | 1.09 (1.08, 1.10)                       | 0       | 55.20%                 | 0.017   |
| Sung K C,2015 [22]        | Both(60%)      | 1.10 (1.08, 1.11)                       | 0       | 62.80%                 | 0.004   |
| Li Y-M,2016 [23]          | Male           | 1.09 (1.08, 1.10)                       | 0       | 55.20%                 | 0.017   |
| Li Y-F,2016 [23]          | Female         | 1.09 (1.08, 1.11)                       | 0       | 60.60%                 | 0.007   |
| Hozawa A-M,2006 [27]      | Male           | 1.10 (1.08, 1.11)                       | 0       | 53.20%                 | 0.023   |
| Hozawa A-F,2006 [27]      | Female         | 1.09 (1.08, 1.11)                       | 0       | 61.40%                 | 0.006   |
